# Supplementary material
Source: PubMed Central journal article supplement (PMC6750738)
Supplement: NIHMS1537108-supplement-1.pdf [file NIHMS1537108-supplement-1.pdf]

Table S1. Wilcoxon-signed rank tests on the most abundant bacterial families before and after antibiotics administration, related to Figure 1.

| Family              | Percent Relative Abundance |                             |                              |                             |                              |                            |                      |                       |
|---------------------|----------------------------|-----------------------------|------------------------------|-----------------------------|------------------------------|----------------------------|----------------------|-----------------------|
|                     | Day -3 Mean (sd)           | Day 0 Mean (sd) (p)         | Day 1 Mean (sd) (p)          | Day 3 Mean (sd) (p)         | Day 7 Mean (sd) (p)          | Day 30 Mean (sd) (p)       | Day 90 Mean (sd) (p) | Day 180 Mean (sd) (p) |
| Lachnospiraceae     | 27.6 (8.94)                | <b>8.91 (13) (0.0113)</b>   | <b>3.12 (4.54) (0.0092)</b>  | <b>2.76 (5.36) (0.0080)</b> | 23.5 (20.7) (0.3983)         | <b>41 (19.9) (0.018)</b>   | 28.3 (9.02) (0.625)  | 23.3 (9.25) (0.154)   |
| Enterobacteriaceae  | 0.125 (0.219)              | <b>39.3 (43.2) (0.0113)</b> | <b>40.4 (40.2) (0.0092)</b>  | <b>55.7 (41) (0.0249)</b>   | <b>15.5 (19.4) (0.0067)</b>  | <b>1.33 (1.61) (0.023)</b> | 0.27 (0.288) (0.083) | 0.15 (0.147) (0.541)  |
| Ruminococcaceae     | 27.3 (7.67)                | <b>8.29 (10.3) (0.0087)</b> | <b>3.74 (9.59) (0.0129)</b>  | <b>3.57 (7.36) (0.0080)</b> | <b>7.42 (10.4) (0.0145)</b>  | <b>13.8 (8.78) (0.029)</b> | 22 (14.6) (0.398)    | 23.1 (13.2) (0.359)   |
| Streptococcaceae    | 0.988 (0.929)              | <b>18.9 (28.1) (0.0087)</b> | <b>28.1 (27.5) (0.0092)</b>  | <b>16.7 (24.7) (0.0323)</b> | 3.99 (6.73) (0.6248)         | 1.1 (1.17) (1.000)         | 1.56 (1.88) (0.142)  | 0.47 (0.388) (0.067)  |
| Bacteroidaceae      | 9.38 (8.38)                | <b>1.02 (1.91) (0.0067)</b> | <b>0.291 (0.48) (0.0244)</b> | <b>1 (2.83) (0.0323)</b>    | <b>0.876 (2.36) (0.0051)</b> | 9.61 (13.9) (0.965)        | 13.3 (14.3) (0.351)  | 19 (15.9) (0.103)     |
| Prevotellaceae      | 9.05 (14.6)                | <b>3.62 (7.53) (0.0454)</b> | 1.82 (4.67) (0.1925)         | <b>4.38 (11.1) (0.0415)</b> | 10 (14.3) (0.8241)           | 5.09 (11.2) (0.068)        | 7.11 (12.7) (0.351)  | 7.26 (12.1) (0.919)   |
| Erysipelotrichaceae | 7.24 (6.13)                | 4.79 (7.56) (0.3066)        | 2.53 (5.83) (0.0756)         | 2.71 (5.66) (0.0528)        | 3.1 (4.64) (0.0830)          | 5.87 (3.08) (0.625)        | 4.76 (3.02) (0.450)  | 7.81 (6.67) (0.308)   |
| Veillonellaceae     | 3.35 (4)                   | <b>1.48 (2.14) (0.0185)</b> | <b>0.978 (2.41) (0.0092)</b> | <b>1.74 (3.93) (0.0059)</b> | 3.7 (1.91) (0.3505)          | 2.28 (1.85) (0.398)        | 3.9 (4.41) (0.563)   | 3.33 (3.84) (0.760)   |

Table S2. Comparison of MN antibody titers before vaccination between phase 1 and phase 2, related to Figure 2.

| <b>Study Phase</b> | <b>No. of subjects enrolled</b> | <b>H1N1<br/>geometric mean<br/>(range)</b> | <b>H3N2<br/>geometric mean<br/>(range)</b> | <b>B<br/>geometric mean<br/>(range)</b> |
|--------------------|---------------------------------|--------------------------------------------|--------------------------------------------|-----------------------------------------|
| <b>Phase 1</b>     | 22                              | 353.3<br>(159.7 – 781.4)                   | 403.2<br>(230.6 – 704.8)                   | 262.5<br>(135.3 – 509.4)                |
| <b>Phase 2</b>     | 11                              | 135.3<br>(13.95 – 89.12)                   | 62.2<br>(28.31 – 136.6)                    | 70.5<br>(30.81 – 161.5)                 |

Table S4. Demographic information of study participants, related to STAR Methods.

| <b>Phase</b>   | <b>Participants<br/>(no.)</b> | <b>Median Age<br/>(range)</b> | <b>Gender (%)</b>          | <b>Race (%)</b>                                                      |
|----------------|-------------------------------|-------------------------------|----------------------------|----------------------------------------------------------------------|
| <b>Phase 1</b> | 22                            | 29<br>(24-38)                 | Male (64%)<br>Female (36%) | White (54%)<br>Black or African American (32%)<br>Mix or other (14%) |
| <b>Phase 2</b> | 11                            | 28<br>(21-40)                 | Male (27%)<br>Female (73%) | White (36%)<br>Black or African American (55%)<br>Mix or other (9%)  |

Table S5. Influenza virus strains contained in the vaccines, related to STAR Methods.

| <b>Phase</b>   | <b>Vaccine Brand/Season</b> | <b>H1N1 strain</b>   | <b>H3N2 strain</b>                   | <b>B strain</b>         |
|----------------|-----------------------------|----------------------|--------------------------------------|-------------------------|
| <b>Phase 1</b> | Fluzone<br>2014-2015        | A/California/07/2009 | A/Texas/50/2012                      | B/Massachusetts/02/2012 |
| <b>Phase 2</b> | Fluzone<br>2015-2016        | A/California/07/2009 | A/Switzerland/9715293/2013<br>NIB-88 | B/Phuket/3073/2013      |
