# Supplementary material
Source: PubMed Central journal article supplement (PMC6750738)

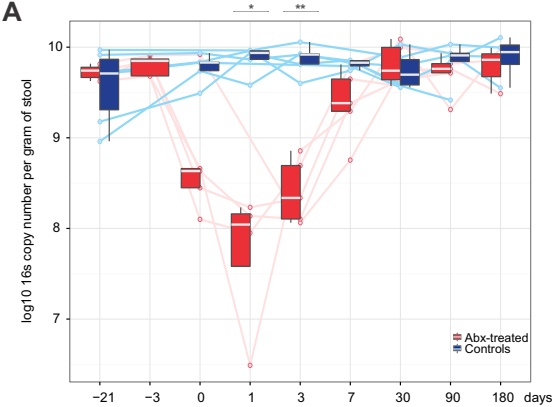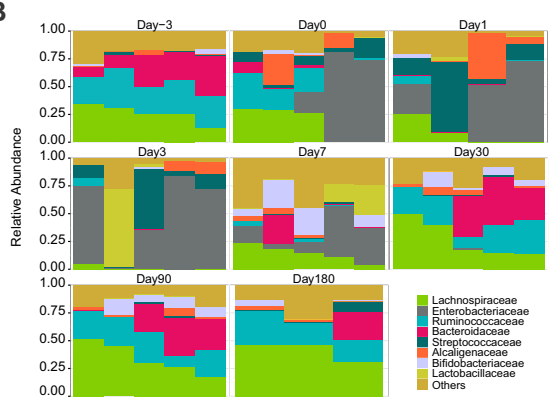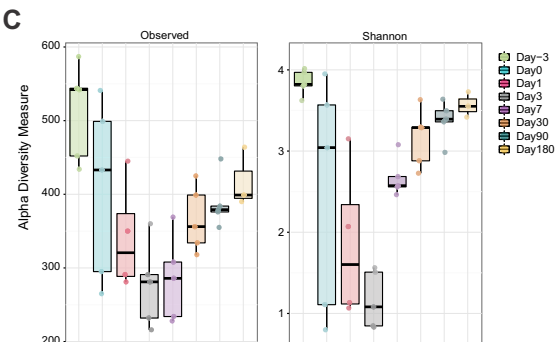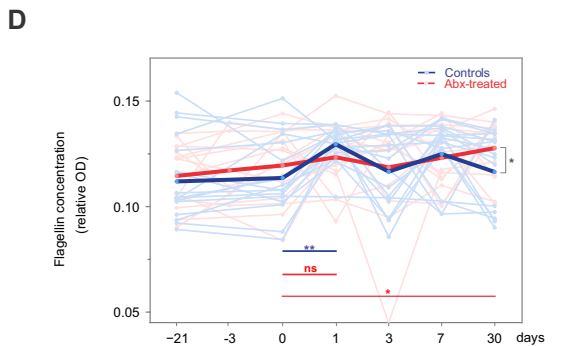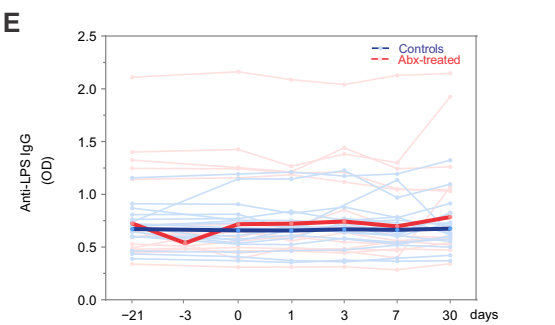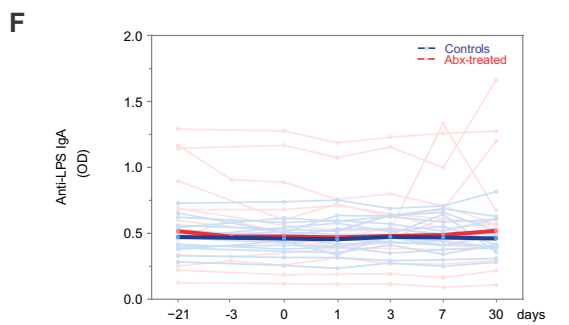

Supplement: NIHMS1537108-supplement-S1.pdf [file NIHMS1537108-supplement-S1.pdf]

**A**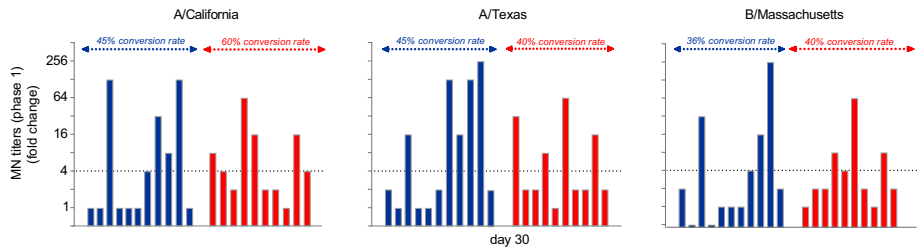**B**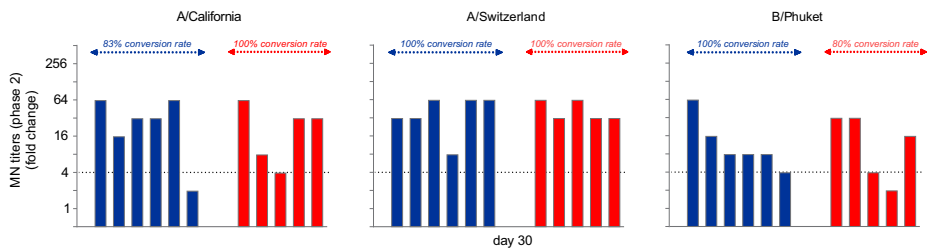**C**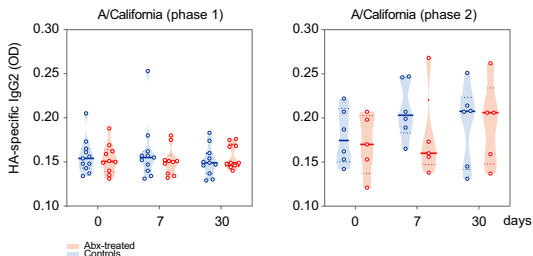**D**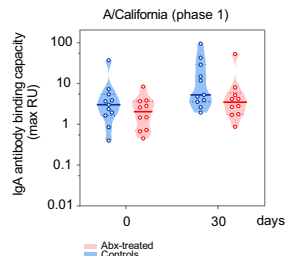

Supplement: NIHMS1537108-supplement-S2.pdf [file NIHMS1537108-supplement-S2.pdf]

**A**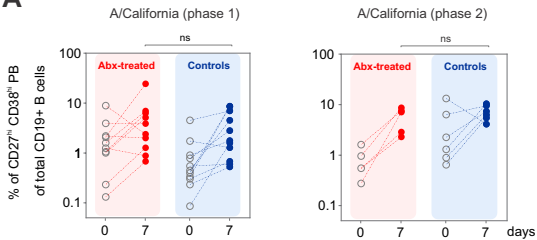**B**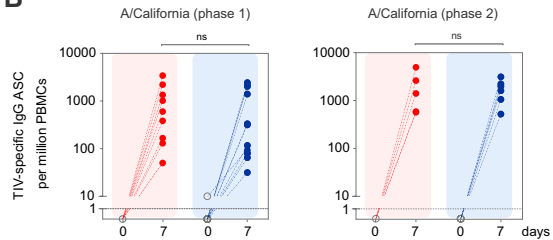**C**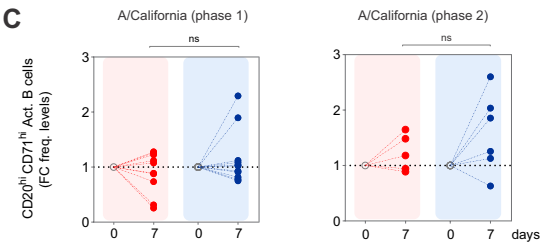**D**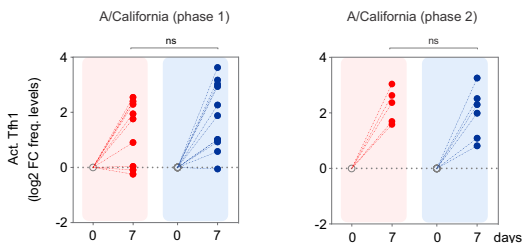**E**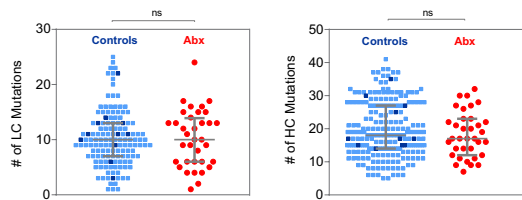

Supplement: NIHMS1537108-supplement-S3.pdf [file NIHMS1537108-supplement-S3.pdf]

**A**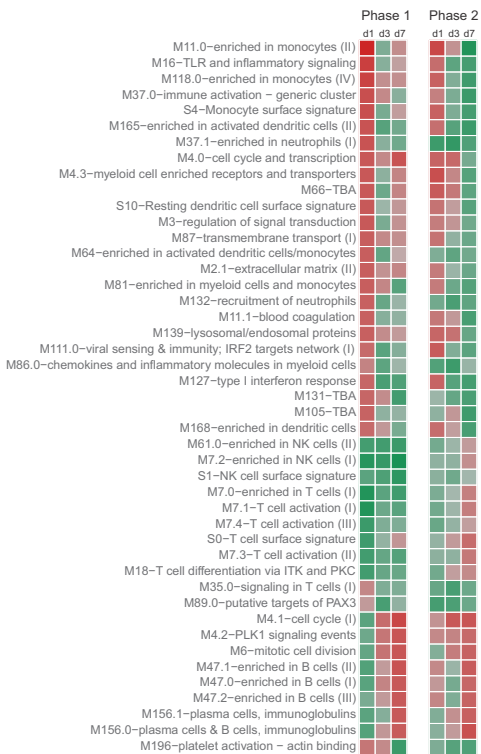**B**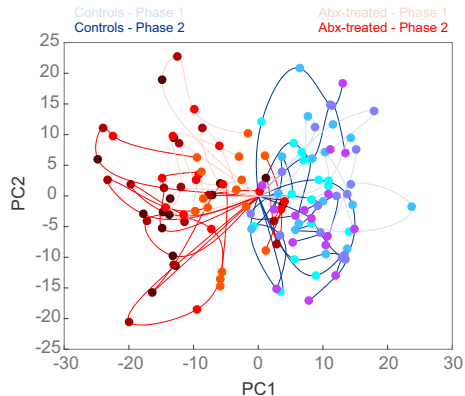**C**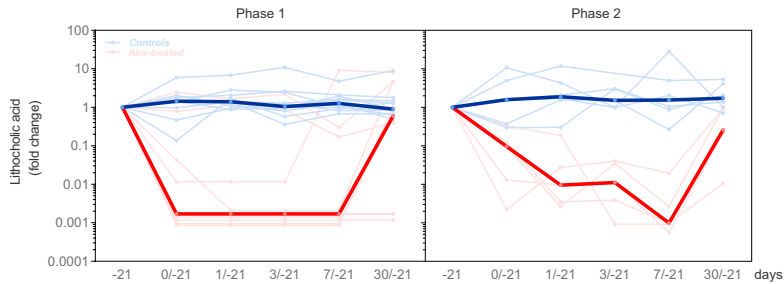

Supplement: NIHMS1537108-supplement-S4.pdf [file NIHMS1537108-supplement-S4.pdf]

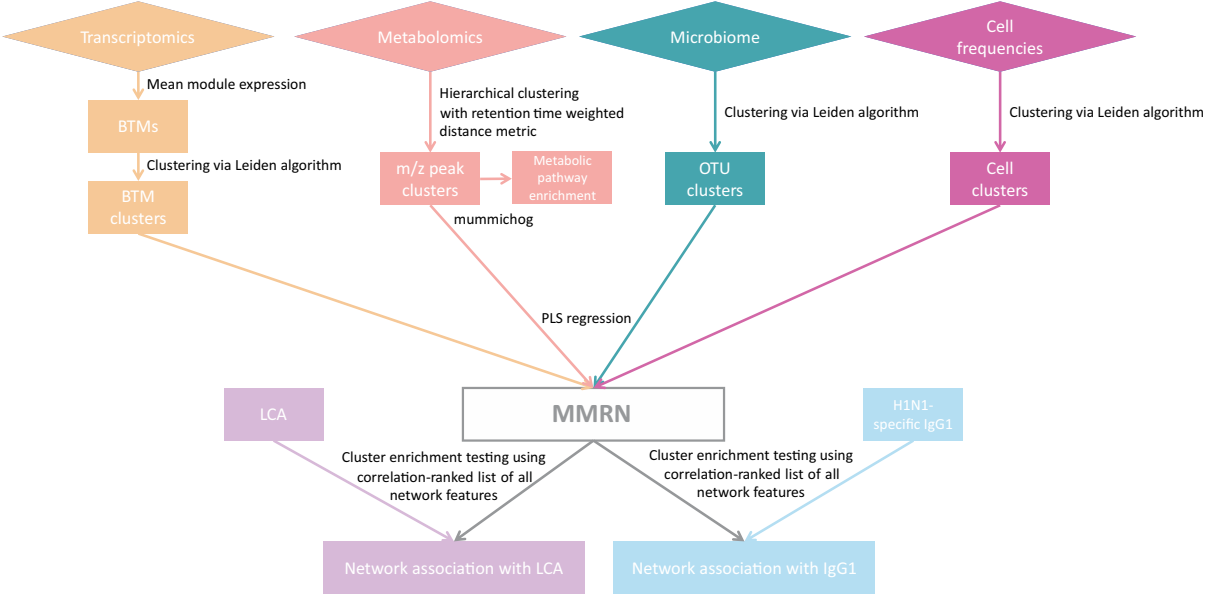

Supplement: NIHMS1537108-supplement-S5.pdf [file NIHMS1537108-supplement-S5.pdf]
